# Supplementary material
Source: PubMed Central journal article supplement (PMC4351744)

# Supplemental Figure 1. Russo et al

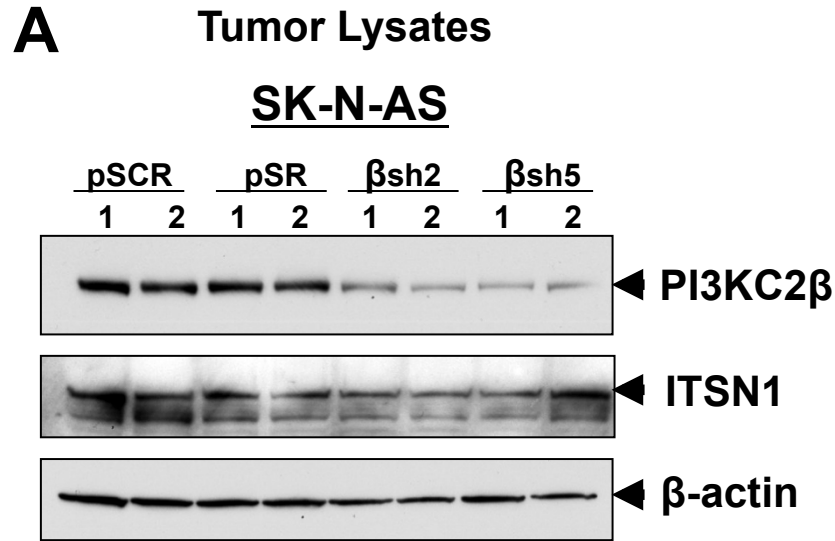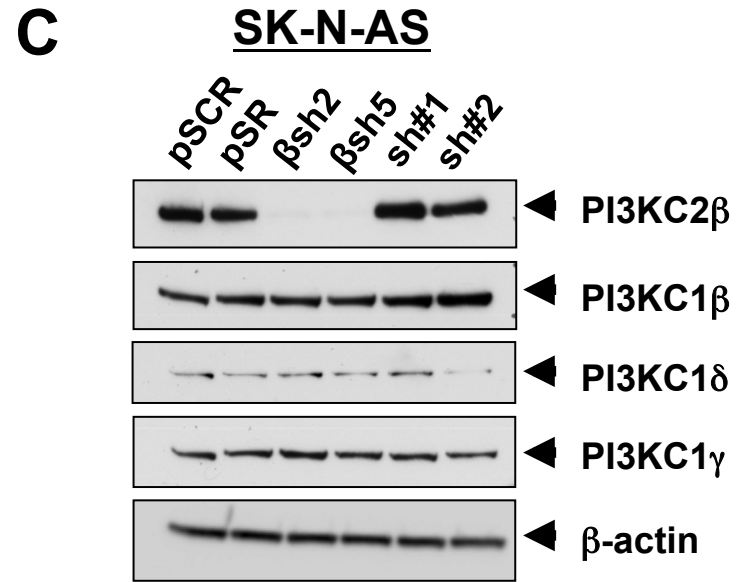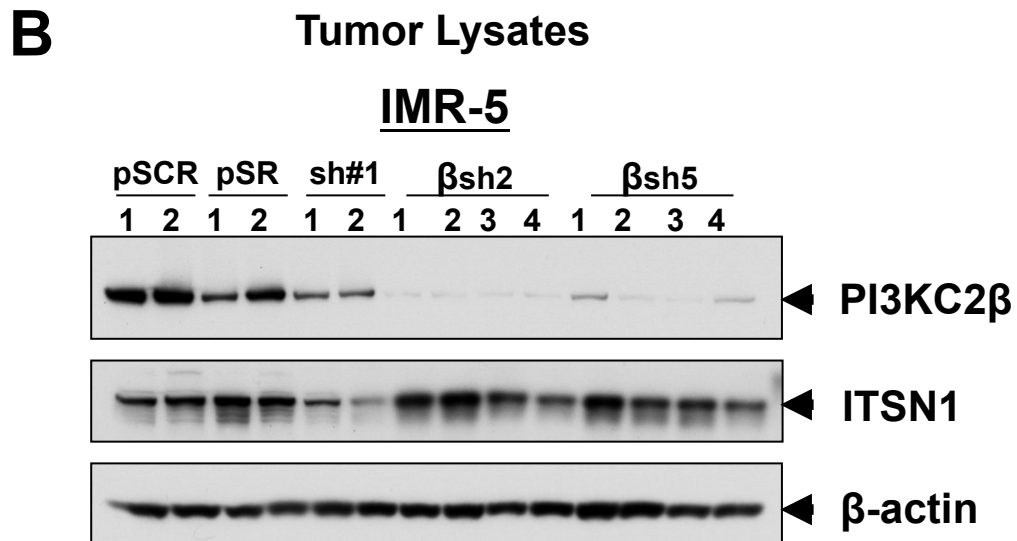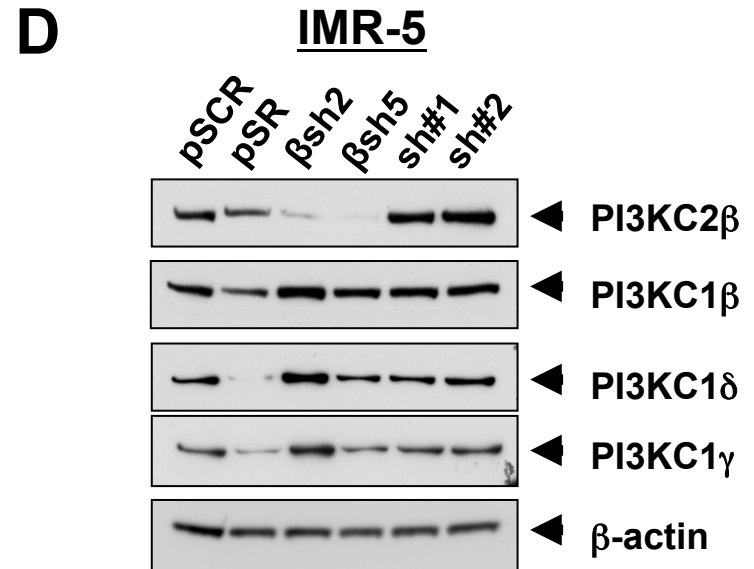

# Supplemental Figure 2. Russo et al

**A**

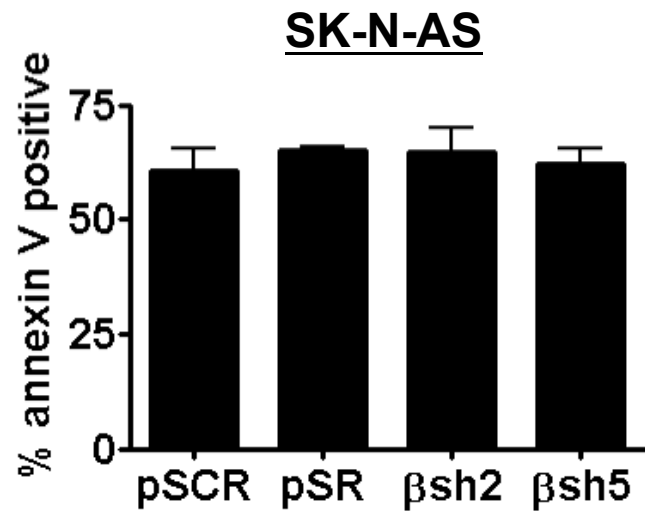

**B**

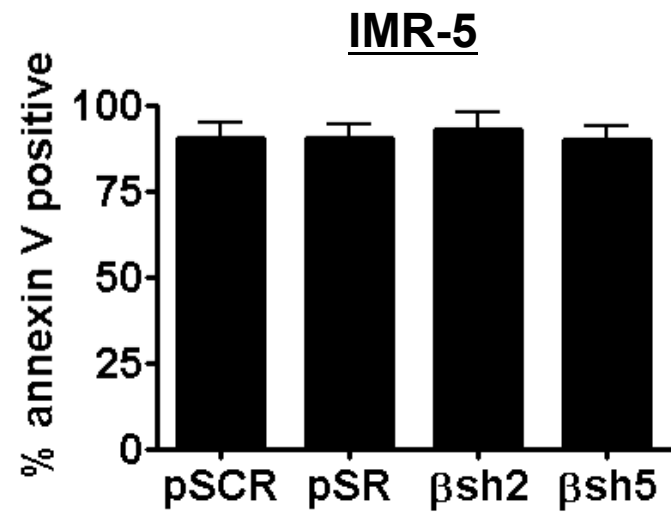

# Supplemental Figure 3. Russo et al

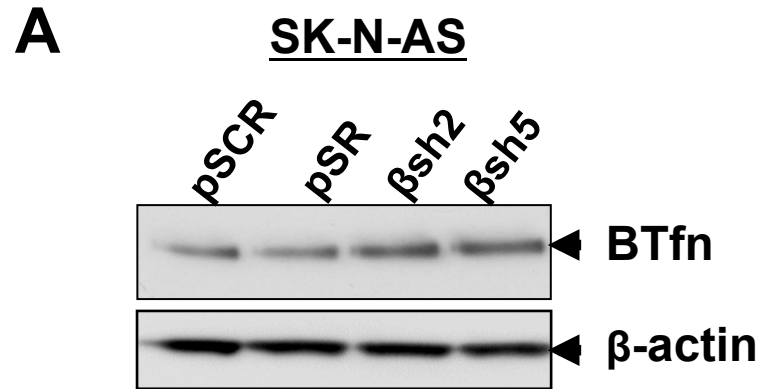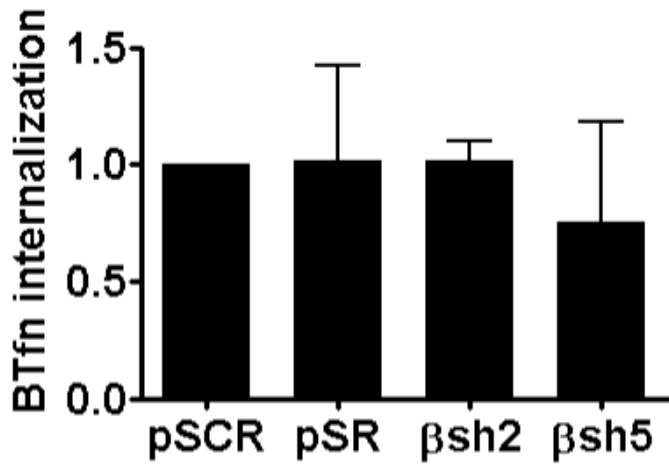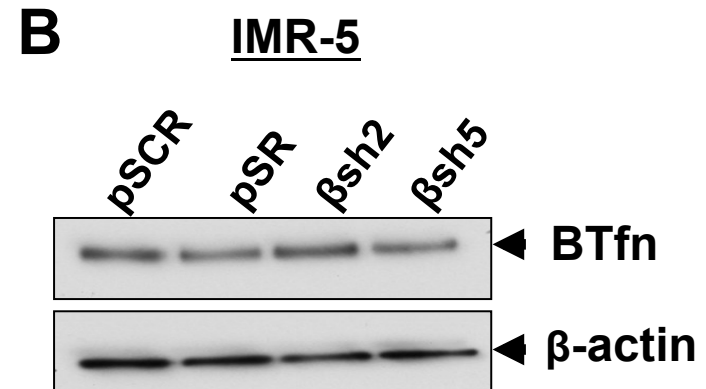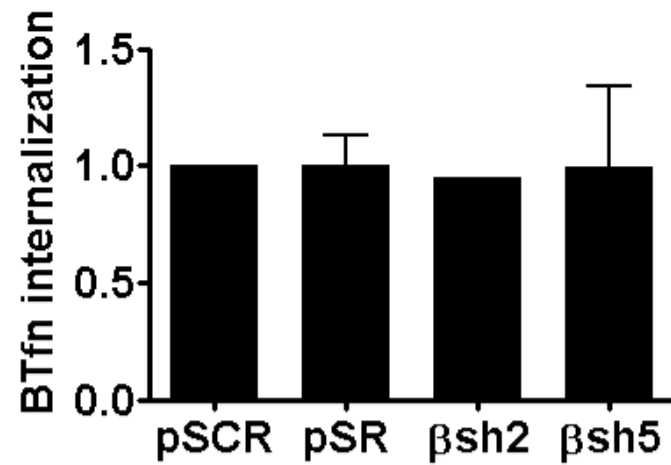

# Supplemental Figure 4. Russo et al

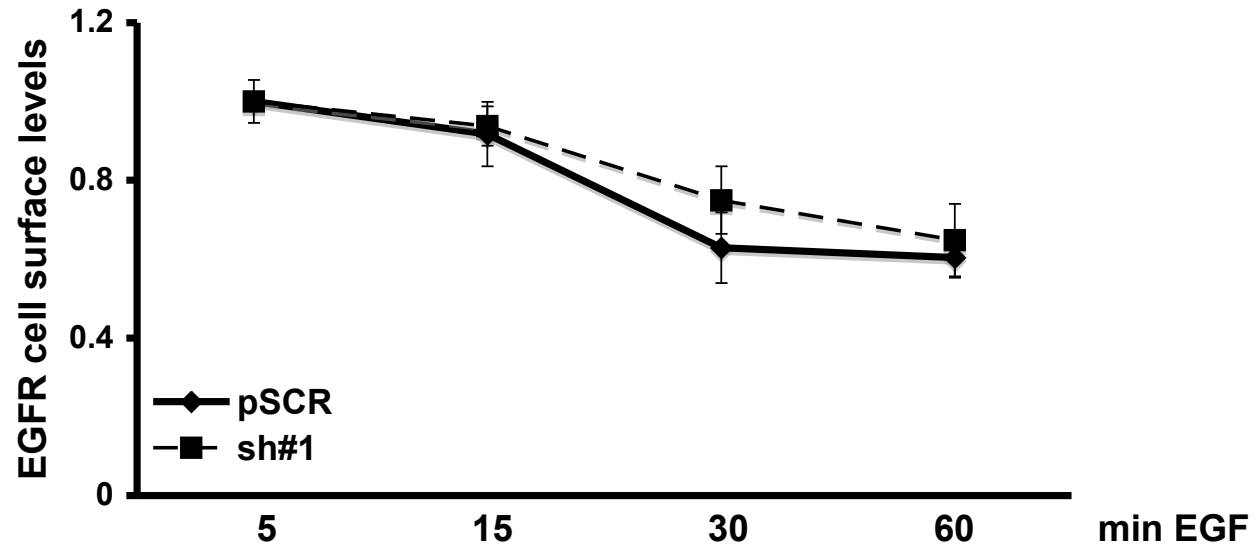

# Supplemental Figure 5. Russo et al

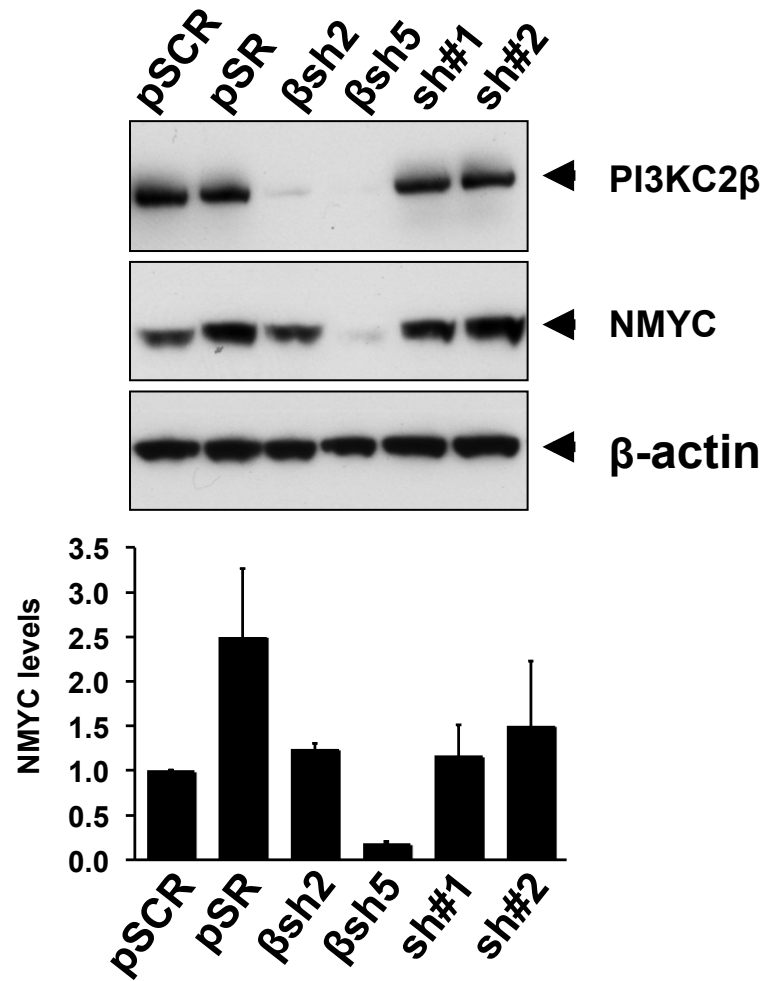

Supplement: NIHMS658137-supplement-1.pdf [file NIHMS658137-supplement-1.pdf]
